# Supplementary material for: Angle information assisting skeleton-based actions recognition
Source: PeerJ Comput Sci. 2024 Nov 29;10:e2523. doi: 10.7717/peerj-cs.2523 (PMC11623218; doi:10.7717/peerj-cs.2523)
Supplement: Supplemental Information 1 [file peerj-cs-10-2523-s001.xls]

## Sheet: Sheet1
Acc(%)	CTRGCN
	j	jm	b	bm	c	cm
Mean Class	0.9094	0.8947	0.9151	0.8958	0.9007	0.8862
Top1	0.9012	0.8824	0.9082	0.8871	0.9035	0.8729
Top5	0.9953	0.9953	0.9953	0.9929	0.9929	0.9906
Acc(%)	CTRGCN								Data	FSD-10	FineGym	NTU RGBD 60	Raw code
	j&b(1:1)	j&b&jm&bm(3:6:1:2)	j&b&c(1:2:1)	j&b&c&jm&bm&cm(4:8:4:0:1:0)					Link	https://shenglanliu.github.io/fsd10/	https://download.openmmlab.com/mmaction/pyskl/data/gym/gym_hrnet.pkl	https://download.openmmlab.com/mmaction/pyskl/data/nturgbd/ntu60_hrnet.pkl	https://github.com/Jiahao-Guan/pyskl_cosine
Mean Class	0.9254	0.932	0.935	0.9362
Top1	0.92	0.9247	0.9318	0.9318
Top5	0.9976	0.9976	0.9976	0.9976
Acc(%)	MSG3D
	j	b	c	j&b(2:1)	j&b&c(1:1:1)
Mean Class	0.9008	0.9049	0.8941	0.9093	0.9167
Top1	0.9012	0.8918	0.8847	0.9059	0.9082
Top5	0.9906	0.9976	0.9953	0.9976	0.9953
Acc(%)	AGCN
	j	b	c	j&b(1:1)	j&b&c(1:1:1)
Mean Class	0.9017	0.915	0.8771	0.9173	0.9255
Top1	0.8894	0.9035	0.8706	0.9082	0.9153
Top5	1	0.9953	0.9976	1	1
CTRGCN&FSD-10&kts_25
Acc(%)	joint						bone						cosine						multi_stream
	j_origin	j0	j1	j2	j3	j4	b	b0	b1	b2	b3	b4	c	c0	c1	c2	c3	c4	j0&b0(1:3)	j4&b4(1:14)	j4&b4&c4(1:27:1)	j4&b4&c_origin(1:1:1)
Mean Class	0.9094	0.9143	0.8943	0.9068	0.9164	0.9241	0.9151	0.9213	0.8982	0.917	0.9292	0.9432	0.9007	0.8944	0.8949	0.9091	0.9005	0.9062	0.9245	0.9432	0.9432	0.9461
Top1	0.9012	0.9012	0.8824	0.9059	0.9035	0.9153	0.9082	0.9129	0.8988	0.9106	0.9271	0.9318	0.9035	0.8871	0.8871	0.9035	0.8871	0.8941	0.9176	0.9318	0.9318	0.9435
Top5	0.9953	0.9953	0.9953	0.9976	0.9976	0.9976	0.9953	0.9906	0.9929	0.9929	0.9976	0.9953	0.9929	0.9906	0.9953	0.9953	0.9976	0.9929	0.9953	0.9976	0.9976	0.9976
CTRGCN&GYM&clip50								CTRGCN&GYM&clip50&keyframe25
Acc(%)	streams							Acc(%)	streams
	j	b	c	j&b(1:1)	j&b&c(2:3:1)				j4	b4	c4	j4&b4(1:1)	j4&b4&c4(2:3:1)	j4&b4&c(2:3:1)
Mean Class	0.8873	0.914	0.8498	0.9196	0.9245			Mean Class	0.8953	0.9152	0.8413	0.9263	0.93	0.9301
Top1	0.9186	0.9367	0.8898	0.9446	0.947			Top1	0.9261	0.9389	0.8837	0.9477	0.9507	0.9507
Top5	0.9946	0.9959	0.9883	0.9967	0.9968			Top5	0.9959	0.9965	0.9894	0.9982	0.9959	0.998
CTRGCN&NTURGBD60_xsub_hrnet
Acc(%)	streams							CTRGCN&NTURGBD60_xsub_hrnet&keyframe25
	j*	b*	c	j&b(1:1)	j&b&c(2:3:1)			Acc(%)	streams
Mean Class	0.9055	0.9265	0.8777	0.9328	0.9357				j4	b4	c4	j&b(1:1)	j&b&c(2:2:1)
Top1	0.9056	0.9266	0.8778	0.9329	0.9358			Mean Class	0.8987	0.9135	0.8734	0.9248	0.9283
Top5	0.9898	0.9942	0.987	0.9942	0.9948			Top1	0.8988	0.9136	0.8735	0.9248	0.9284
								Top5	0.9912	0.9924	0.9882	0.9932	0.9934
CTRGCN&NTURGBD60_xview_hrnet
Acc(%)	streams							CTRGCN&NTURGBD60_xview_hrnet&keyframe25
	j*	b*	c	j&b(1:1)	j&b&c(5:6:1)			Acc(%)	streams
Mean Class	0.9694	0.9754	0.8697	0.9837	0.9836				j	b	c	j&b(1:1)	j&b&c(4:4:1)
Top1	0.9694	0.9754	0.8696	0.9837	0.9836			Mean Class	0.9574	0.9569	0.8747	0.9723	0.9723
Top5	0.9995	0.9997	0.9898	0.9998	0.9998			Top1	0.9574	0.9568	0.8747	0.9723	0.9723
								Top5	0.9995	0.9994	0.9917	0.9997	0.9997
